# Supplementary material
Source: Springer Nature journal article supplement (https://www.springermedizin.de/resource/supplementary/12969_2010_423_MOESM5_ESM.pdf/9593016)

**RATIO (x 1000)**

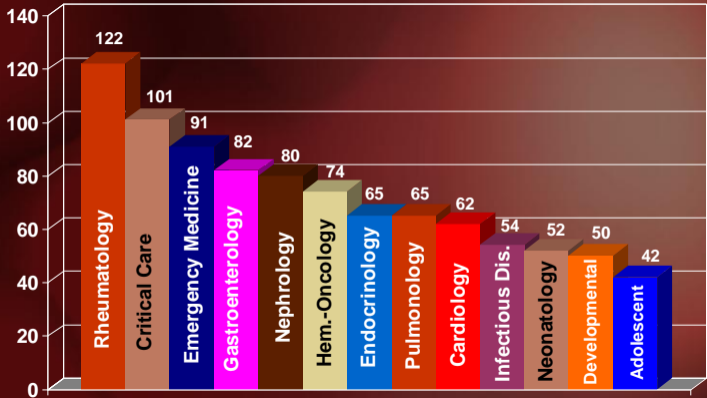

Supplement: MOESM5 [file 9593016]
